# Supplementary material for: At Short Telomeres Tel1 Directs Early Replication and Phosphorylates Rif1
Source: PubMed Central journal article supplement (PMC4199499; doi:10.1371/journal.pgen.1004691), 2014-10-16
Supplement: pgen.1004691.s006.pdf [file pgen.1004691.s006.pdf]

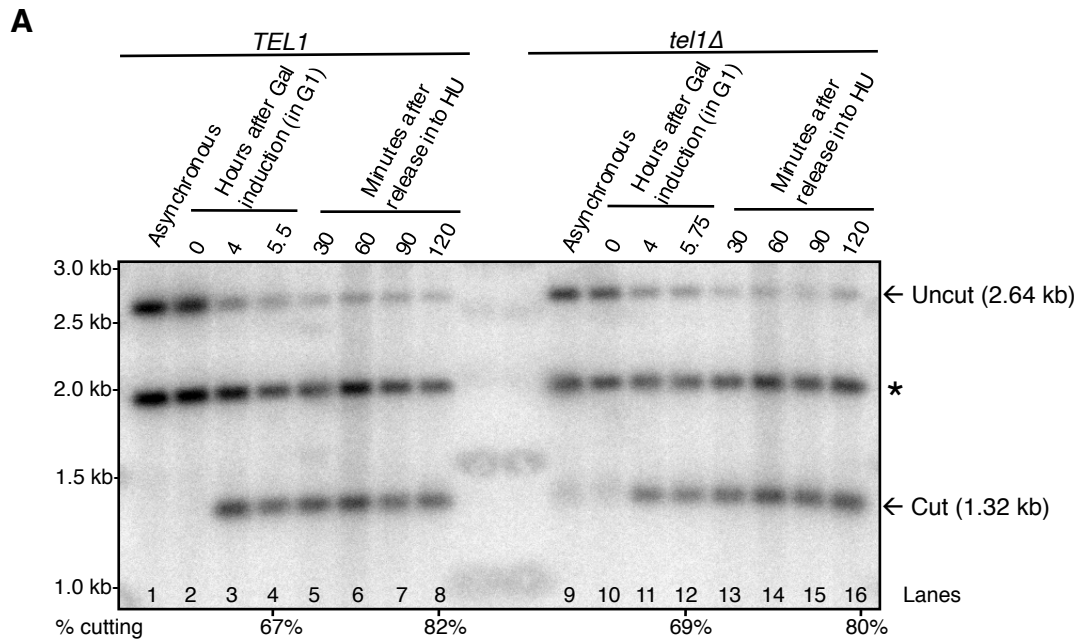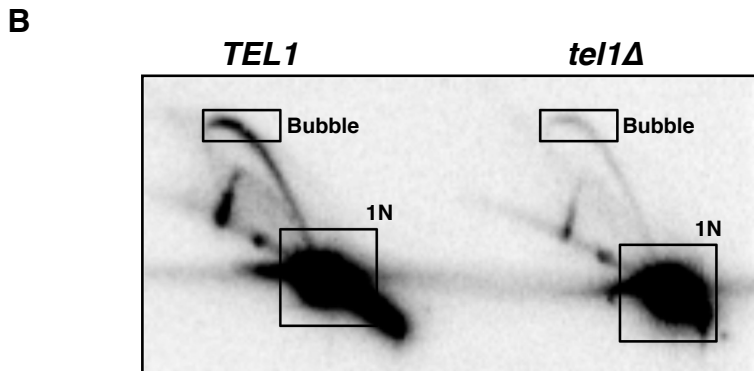

**C**

|                 | 1N spot (= Loading) |              | Bubble      |              | Fold change in <i>tel1Δ</i><br>(normalized to loading) |
|-----------------|---------------------|--------------|-------------|--------------|--------------------------------------------------------|
|                 | <i>TEL1</i>         | <i>tel1Δ</i> | <i>TEL1</i> | <i>tel1Δ</i> |                                                        |
| <b>ARS700.5</b> | 120,999             | 101,607      | 22,529      | 3,977        | 0.21                                                   |
| <b>ARS305</b>   | 129,389             | 180,569      | 21,983      | 27,864       | 0.91                                                   |
| <b>ARS1412</b>  | 586,753             | 671,186      | 1,216       | 1,279        | 0.92                                                   |

**Figure S4. Tel1 is required for efficient activation in hydroxyurea of the ARS700.5 origin neighboring an induced short telomere.**
