# Supplementary material for: At Short Telomeres Tel1 Directs Early Replication and Phosphorylates Rif1
Source: PubMed Central journal article supplement (PMC4199499; doi:10.1371/journal.pgen.1004691), 2014-10-16
Supplement: pgen.1004691.s007.pdf [file pgen.1004691.s007.pdf]

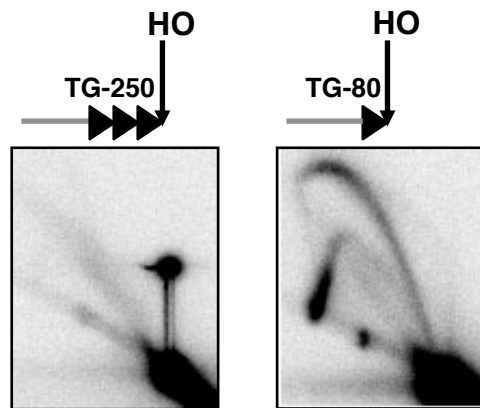

**Figure S5. Activation of ARS700.5 depends on the length of nearby telomeric repeats.**
