# Supplementary material for: At Short Telomeres Tel1 Directs Early Replication and Phosphorylates Rif1
Source: PubMed Central journal article supplement (PMC4199499; doi:10.1371/journal.pgen.1004691), 2014-10-16
Supplement: pgen.1004691.s010.pdf [file pgen.1004691.s010.pdf]

**A** Phospho Serine-1308 (mis-cleaved peptide)  
[KVDS(ph)QDIQVPATQGM(ox)KEPPSSIQISSQISAK]

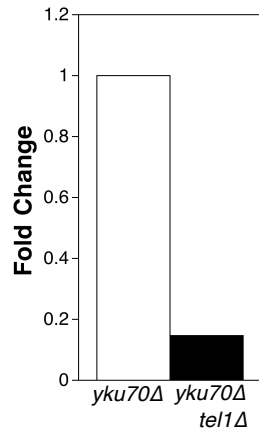

**B** Phospho Serine-1308 (mis-cleaved peptide)  
[KVDS(ph)QDIQVPATQGM(ox)KEPPSSIQISSQISAK]

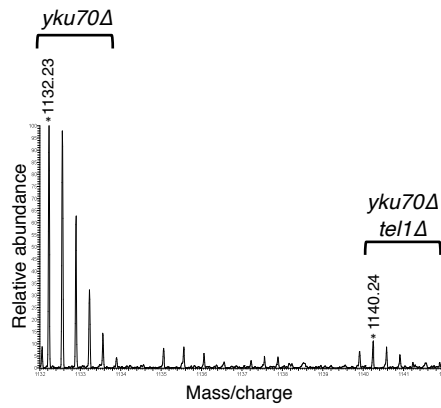

**C** Non-phosphorylated Serine-1308 (mis-cleaved peptide)  
[KVDSQDIQVPATQGM(ox)KEPPSSIQISSQISAK]

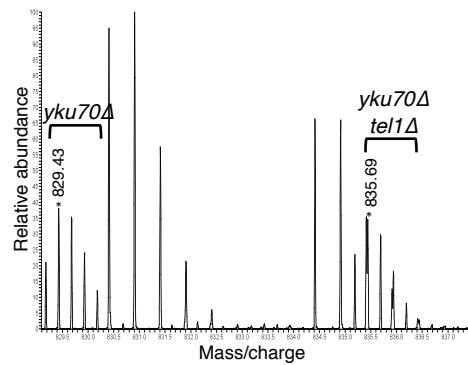

**Figure S8. Abundance of a longer Rif1 peptide, phosphorylated at Serine-1308, is decreased in the absence of Tel1**
