# Supplementary material for: At Short Telomeres Tel1 Directs Early Replication and Phosphorylates Rif1
Source: PubMed Central journal article supplement (PMC4199499; doi:10.1371/journal.pgen.1004691), 2014-10-16
Supplement: pgen.1004691.s011.pdf [file pgen.1004691.s011.pdf]

# Rif1 (YBR275C)

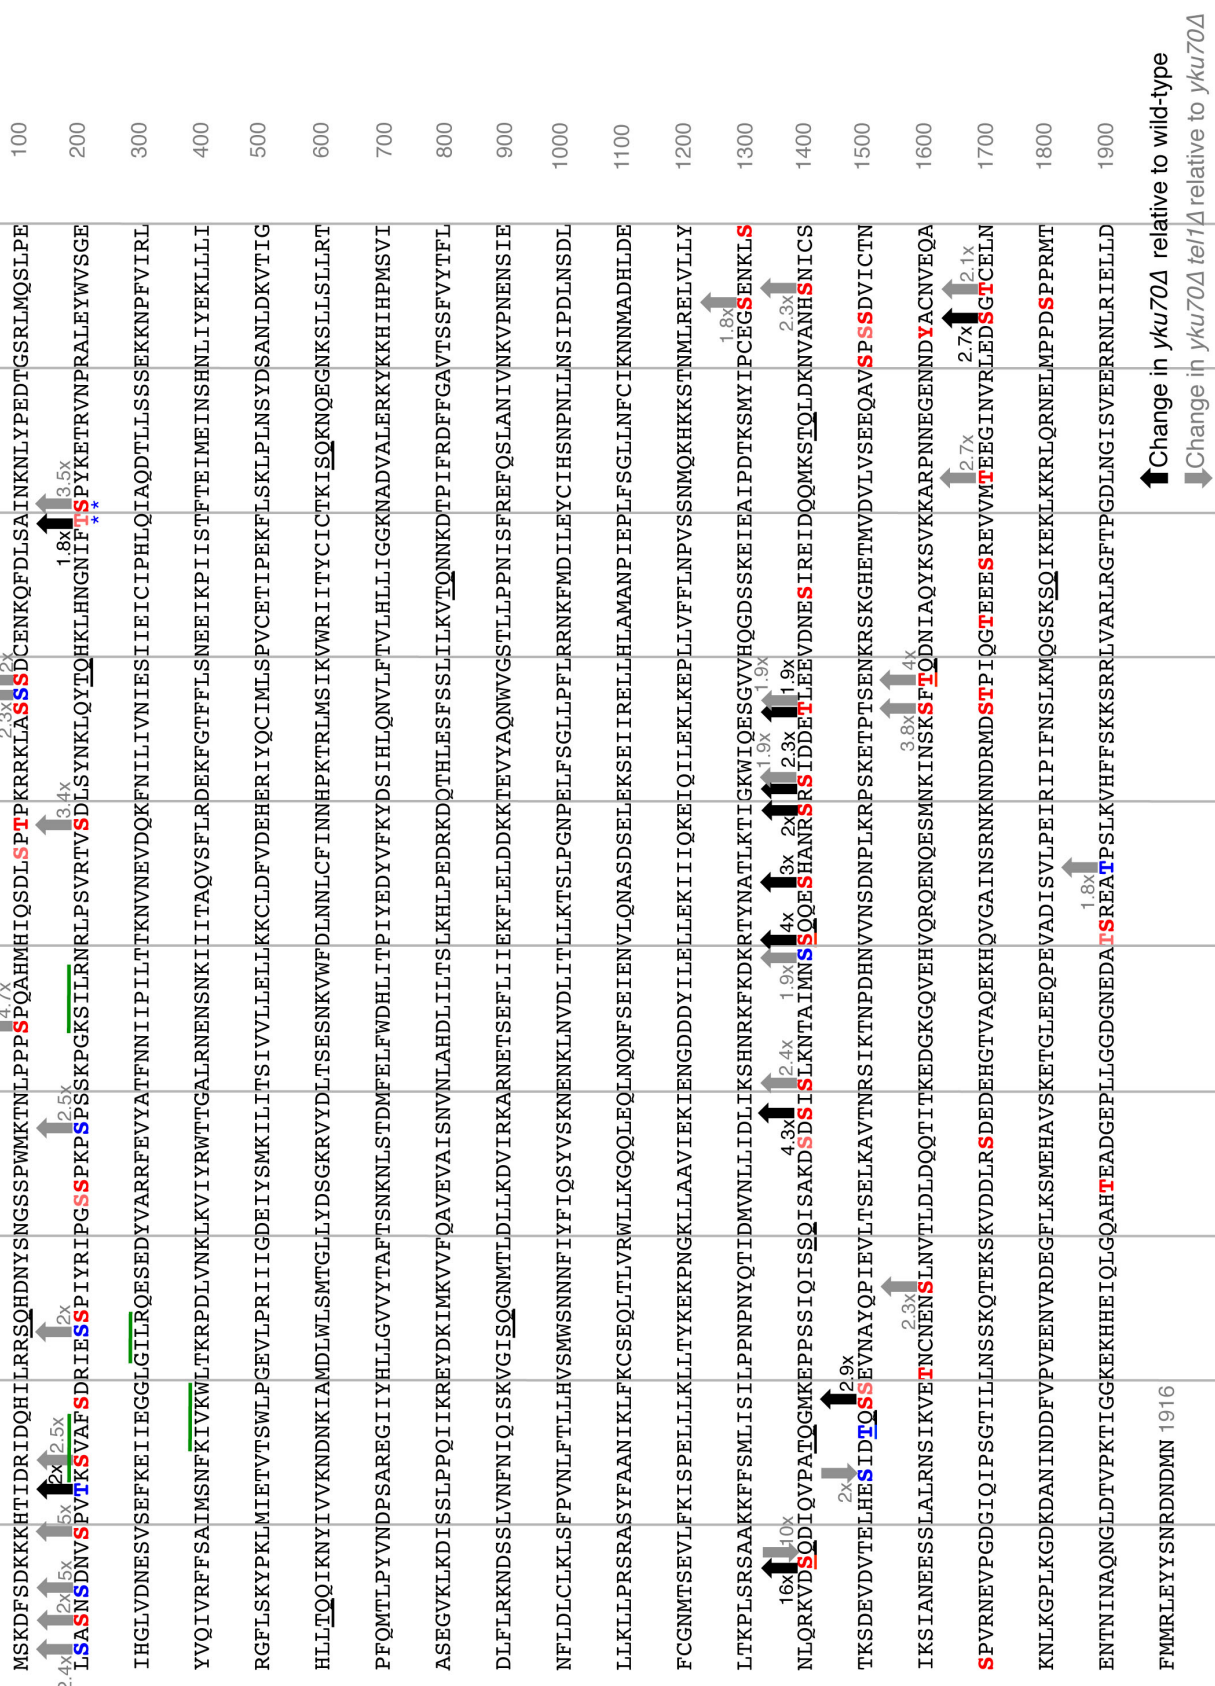

↑ Change in *yku70Δ* relative to wild-type  
 ↓ Change in *yku70Δ tel1Δ* relative to *yku70Δ*

Figure S9. Summary of phosphorylation sites identified in Rif1
