# Supplementary material for: At Short Telomeres Tel1 Directs Early Replication and Phosphorylates Rif1
Source: PubMed Central journal article supplement (PMC4199499; doi:10.1371/journal.pgen.1004691), 2014-10-16
Supplement: pgen.1004691.s014.pdf [file pgen.1004691.s014.pdf]

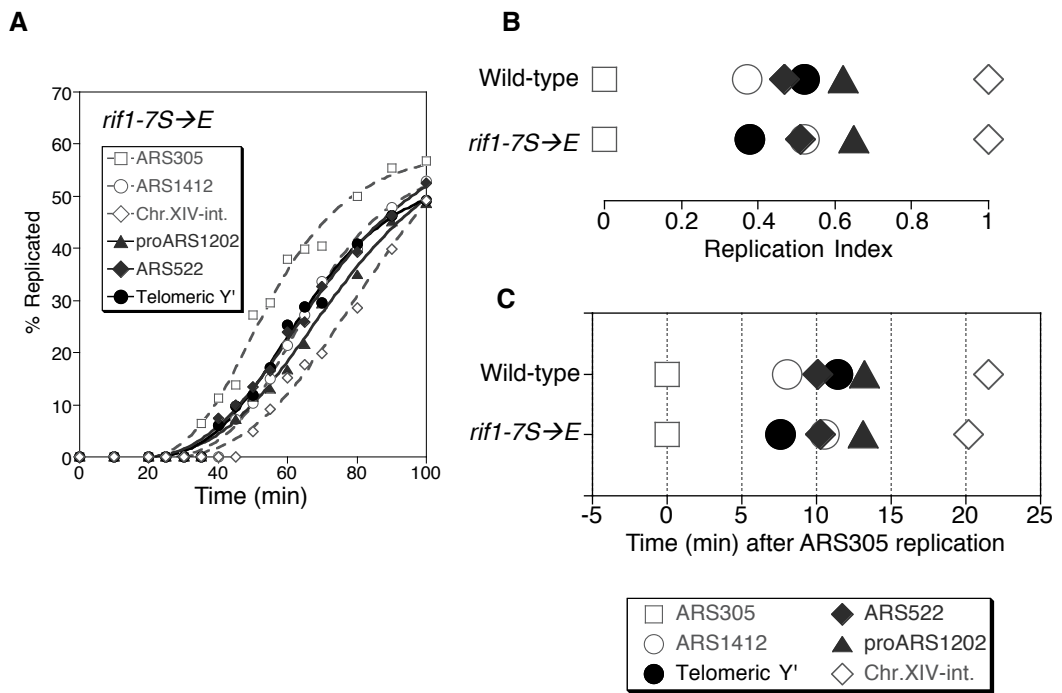

**Figure S12. In the *rif1-7S*→*E* mutant telomere replication time is not advanced relative to ARS1412.**
